# Supplementary material for: Impact of chronic Achilles tendinopathy on health-related quality of life, work performance, healthcare utilisation and costs
Source: PubMed Central journal article supplement (PMC8006822; doi:10.1136/bmjsem-2020-001023), 2021-03-26
Supplement: bmjsem-2020-001023supp001.pdf [file bmjsem-2020-001023supp001.pdf]

**Supplementary file 1. Cost used in the economic evaluation**

**Article title:** Impact of chronic Achilles tendinopathy on health-related quality of life, work performance, healthcare utilization, and costs

**Journal name:** BMJ Open Sport & Exercise Medicine

**Authors:** Tjerk SO Sleswijk Visser, Arco C van der Vlist, Robert F van Oosterom, Peter LJ van Veldhoven, Jan AN Verhaar, Robert-Jan de Vos

**Affiliation and e-mail address of the corresponding author:** Department of Orthopedics and Sports Medicine, Erasmus MC University Medical Centre, email: t.sleswijkvisser@erasmusmc.nl

Costs used in the economic evaluation are presented in Table 1. We established medical costs per visit to a General Practitioner, sports physician/orthopedic surgeon or physiotherapist based on a guideline for economic evaluations in healthcare published by the Dutch Healthcare Authority.(1, 2) In 2018 shockwave therapy was gathered under regular physiotherapy.(3) To prevent overestimating we gathered Dry Needling and Laser therapy under regular therapy as well. Healthcare costs per visit to a podiatrist were estimated using an independent healthcare insurance comparator. (4)

| Direct healthcare costs per visit     | Euro's        |
|---------------------------------------|---------------|
| General practitioner (<20 min)        | 33.0 (\$37)   |
| Sports Physician/Orthopedic Surgeon ) | 91.0 (\$101)  |
| Physiotherapist (intake)              | 33.0 (\$37)   |
| Shockwave therapy                     | 33.0 (\$37)   |
| Laser therapy or EPTE                 | 33.0 (\$37)   |
| Dry Needling                          | 33.0 (\$37)   |
| Injection                             | 40.06 (\$44)  |
| Podiatrist                            | 150.0 (\$167) |

**Table 1. Costs used in the economic evaluation**

**References**

1. IJzerman MJ ea. Richtlijn voor het uitvoeren van economische evaluaties in de gezondheidszorg. Door Zorginstituut Nederland. In samenwerking met het ministerie van VWS. . 2016.
2. Hakkaart-van Roijen L VdLN, Bouwmans C, Kanters T, Tan SS. . Kostenhandleiding. Methodologie van kostenonderzoek en referentieprijzen voor economische evaluaties in de gezondheidszorg. In opdracht van Zorginstituut Nederland. Geactualiseerde versie 2015.
3. Factsheet De rekening van de fysiotherapeut, p.2. [https://puc.overheid.nl/nza/doc/PUC\\_3372\\_22/1/](https://puc.overheid.nl/nza/doc/PUC_3372_22/1/) Accessed on 13-04-2020.
4. <https://www.independer.nl/zorgverzekering/vergoedingen/steunzolen.aspx> Accessed on 13-04-2020.
