# Supplementary material for: Impact of chronic Achilles tendinopathy on health-related quality of life, work performance, healthcare utilisation and costs
Source: PubMed Central journal article supplement (PMC8006822; doi:10.1136/bmjsem-2020-001023), 2021-03-26
Supplement: bmjsem-2020-001023supp002.pdf [file bmjsem-2020-001023supp002.pdf]

**Supplementary file 2 Completeness of data**

**Article title:** Impact of chronic Achilles tendinopathy on health-related quality of life, work performance, healthcare utilization, and costs

**Journal name:** BMJ Open Sport & Exercise Medicine

**Authors:** Tjerk SO Sleswijk Visser, Arco C van der Vlist, Robert F van Oosterom, Peter LJ van Veldhoven, Jan AN Verhaar, Robert-Jan de Vos

**Affiliation and e-mail address of the corresponding author:** Department of Orthopedics and Sports Medicine, Erasmus MC University Medical Centre, email: t.sleswijkvisser@erasmusmc.nl

|                                     | <b>Completeness of data (%)</b> |
|-------------------------------------|---------------------------------|
| <b>EQ-5D score</b>                  | 80/80 (100)                     |
|                                     |                                 |
| <b>Type of healthcare provider</b>  |                                 |
| Physiotherapist                     | 47/67 (75%)                     |
| Sports physician/Orthopedic surgeon | 22/22 (100%)                    |
| General Practitioner                | 31/31 (100%)                    |
| Podiatrist                          | 18/18 (100%)                    |
| Other                               | 6/6 (100%)                      |
|                                     |                                 |
| <b>Type of treatment</b>            |                                 |
| Physiotherapy                       | 47/67 (75%)                     |
| Shockwave                           | 28/35 (80%)                     |
| Acupuncture/Dry Needling            | 12/16 (75%)                     |
| Laser therapy/EPTE                  | 6/7 (86%)                       |
| Injection                           | 8/8 (100%)                      |

**Table 1. Completeness of data for the EQ-5D score and per type of healthcare provider/treatment.**
