# Supplementary material for: Impact of chronic Achilles tendinopathy on health-related quality of life, work performance, healthcare utilisation and costs
Source: PubMed Central journal article supplement (PMC8006822; doi:10.1136/bmjsem-2020-001023), 2021-03-26
Supplement: bmjsem-2020-001023supp003.pdf [file bmjsem-2020-001023supp003.pdf]

**Supplementary file 3**

**Article title:** Impact of chronic Achilles tendinopathy on health-related quality of life, work performance, healthcare utilization, and costs

**Journal name:** BMJ Open Sport & Exercise Medicine

**Authors:** Tjerk SO Sleswijk Visser, Arco C van der Vlist, Robert F van Oosterom, Peter LJ van Veldhoven, Jan AN Verhaar, Robert-Jan de Vos

**Affiliation and e-mail address of the corresponding author:** Department of Orthopedics and Sports Medicine, Erasmus MC University Medical Centre, email: t.sleswijkvisser@erasmusmc.nl

Costs for additional imaging modalities requested by a medical specialist (sports physician/orthopedic surgeon) are presented in Table 1. This table illustrates three different scenarios to gain insight in the possible impact of including imaging costs in our study. In scenario 1 none of the participants had an ultrasound or MRI. In scenario 2 all of the participants had an ultrasound of the lower leg. In scenario 3 all participants had a MRI of the lower leg. Costs for ultrasound (€119,47) and MRI (€424,93) are based on standard costs for those imaging modalities in the Netherlands.

| <b>Secondary Care</b> (Sports medicine physician/orthopedic surgeon) | <b>Mean (SD) medical costs</b> | <b>Median (IQR) medical costs</b> |
|----------------------------------------------------------------------|--------------------------------|-----------------------------------|
| <b>Scenario 1</b> (None of the participants received imaging)        | €36 (71)                       | €0 (0-42)                         |
| <b>Scenario 2</b> (All participants received an ultrasound)          | €155 (71)                      | €119 (119-161)                    |
| <b>Scenario 3</b> (All participants received a MRI)                  | €461 (71)                      | €425 (424-467)                    |

**Table 1. Additional annual medical costs as a result of imaging studies per patient.**
