# Supplementary material for: Impact of chronic Achilles tendinopathy on health-related quality of life, work performance, healthcare utilisation and costs
Source: PubMed Central journal article supplement (PMC8006822; doi:10.1136/bmjsem-2020-001023), 2021-03-26
Supplement: bmjsem-2020-001023supp004.pdf [file bmjsem-2020-001023supp004.pdf]

**Supplementary file 4. Costs in dollars (\$). Calculated using the average exchange rate of 2018 (1.18)**

**Article title:** Impact of chronic Achilles tendinopathy on health-related quality of life, work performance, healthcare utilization, and costs

**Journal name:** BMJ Open Sport & Exercise Medicine

**Authors:** Tjerk SO Sleswijk Visser, Arco C van der Vlist, Robert F van Oosterom, Peter LJ van Veldhoven, Jan AN Verhaar, Robert-Jan de Vos

**Affiliation and e-mail address of the corresponding author:** Department of Orthopedics and Sports Medicine, Erasmus MC University Medical Centre, email: t.sleswijkvisser@erasmusmc.nl

| Health care provider                         | Patients using resource, no. (%) | Mean resource consumption (% of all healthcare visits) | Mean (SD) medical costs | Median (IQR) medical costs |
|----------------------------------------------|----------------------------------|--------------------------------------------------------|-------------------------|----------------------------|
| <b>Primary care (visits)</b>                 |                                  |                                                        |                         |                            |
| General Practitioner                         | 31 (39)                          | 0.50 (4.6)                                             | \$20 (55)               | \$0 (0-20)                 |
| Physical therapist                           | 67 (84)                          | 9.7 (88.2)                                             | \$378 (706)             | \$208 (39-419)             |
| Podiatrist                                   | 18 (23)                          | 0.15 (1.4)                                             | \$27 (60)               | \$0 (0-0)                  |
| Other†                                       | 6 (8)                            | 0.27 (2.4)                                             | \$24 (111)              | \$0 (0-0)                  |
| <b>Secondary Care (visits)</b>               |                                  |                                                        |                         |                            |
| Sports medicine physician/orthopedic surgeon | 22 (28)                          | 0.37 (3.4)                                             | \$42 (84)               | \$0 (0-50)                 |
| <b>Total</b>                                 |                                  | 10.8 (100)*                                            | \$490 (745)             | \$304 (155-566)            |

**Table 1. Annual health care utilization and medical costs per patient, per type of healthcare provider (n=80)**

Abbreviations: IQR: interquartile range, SD: standard deviation

\* Total median (IQR) annual healthcare visits was 9 (3-11).

† Another healthcare provider (e.g. osteopath, chiropractor or alternative medicine).

Differences between healthcare visits/costs and total visits/costs are due to rounding off

| Health care resource | Patients using | Mean resource | Mean (SD) | Median (IQR) |
|----------------------|----------------|---------------|-----------|--------------|
|----------------------|----------------|---------------|-----------|--------------|

|                           | resource, no. (%) | consumption (% of all healthcare visits) | medical costs | medical costs |
|---------------------------|-------------------|------------------------------------------|---------------|---------------|
| <b>Treatments (units)</b> |                   |                                          |               |               |
| Physiotherapy*            | 67 (84)           | 3.6 (33)                                 | \$142 (428)   | \$0 (0-184)   |
| Shockwave                 | 35 (44)           | 2.6 (24)                                 | \$101 (262)   | \$0 (0-117)   |
| Acupuncture/dry needling  | 16 (20)           | 1.7 (16)                                 | \$65 (315)    | \$0 (0-0)     |
| Laser therapy/EPTE        | 7 (9)             | 0.33 (3)                                 | \$13 (55)     | \$0 (0-0)     |
| Injection therapy†        | 8 (10)            | 0.06 (0.6)                               | \$2 (11)      | \$0 (0-0)     |

**Table 2. Annual health care utilization and medical costs per patient, per type of treatment (n=80)**

Abbreviations: IQR: interquartile range, SD: standard deviation. EPTE: therapeutic percutaneous electrolysis

\* 'Regular physiotherapy treatment' (e.g. exercise therapy, massage therapy and taping) performed by a physiotherapist.

† Prolotherapy, platelet-rich plasma or corticosteroids
